# Supplementary material for: Complications, Not Minimally Invasive Surgical Technique, Are Associated with Increased Cost after Esophagectomy
Source: Hindawi journal article supplement (doi:10.1155/2016/7690632), 2016-01-01
Supplement: f1 [file 7690632.f1.pdf]

Supplemental tables and figures

Table S1: Complication types and frequencies

| <b>Post-operative Events (n=80)</b>                                                   | <b>N Frequency (%)</b> |
|---------------------------------------------------------------------------------------|------------------------|
| 30 day return to OR                                                                   | 16 (20%)               |
| Reoperation for bleeding                                                              | 1 (1%)                 |
| Reoperation for anastomotic leak                                                      | 2 (3%)                 |
| Reoperation for chyle leak                                                            | 2 (3%)                 |
| Reoperation for empyema                                                               | 1 (1%)                 |
| Endoscopy for evaluation and/or treatment of leak                                     | 2 (3%)                 |
| Bronchoscopy for atelectasis                                                          | 1 (1%)                 |
| Surgical management of recurrent laryngeal nerve paresis                              | 1 (1%)                 |
| Endoscopic evaluation and/or treatment of delayed gastric emptying (pyloric stenosis) | 3 (4%)                 |
| Other (splenectomy, jejunostomy tube complications)                                   | 3 (4%)                 |
| Atrial fibrillation                                                                   | 12 (15%)               |
| Leak of any grade                                                                     | 11 (14%)               |
| Pneumonia                                                                             | 11 (14%)               |
| Readmission within 30 days                                                            | 11 (14%)               |
| Reintubation                                                                          | 8 (10%)                |
| Unexpected ICU admission                                                              | 5 (6%)                 |
| Postoperative transfusions                                                            | 4 (5%)                 |
| Laryngeal nerve paresis                                                               | 3 (4%)                 |
| Urinary tract infection                                                               | 3 (4%)                 |
| Pulmonary embolism                                                                    | 2 (3%)                 |
| Atelectasis                                                                           | 2 (3%)                 |
| Gastric outlet obstruction                                                            | 2 (3%)                 |
| Chyle leak                                                                            | 2 (3%)                 |
| Tracheostomy                                                                          | 1 (1%)                 |
| Surgical site infection                                                               | 1 (1%)                 |
| Other (esophageal stricture, sepsis, urinary retention)                               | 3 (4%)                 |
| Any complication                                                                      | 42 (53%)               |

Abbreviations: ICU = Intensive Care Unit. OR = operating room.

Figure S1: OR costs plotted over OR time

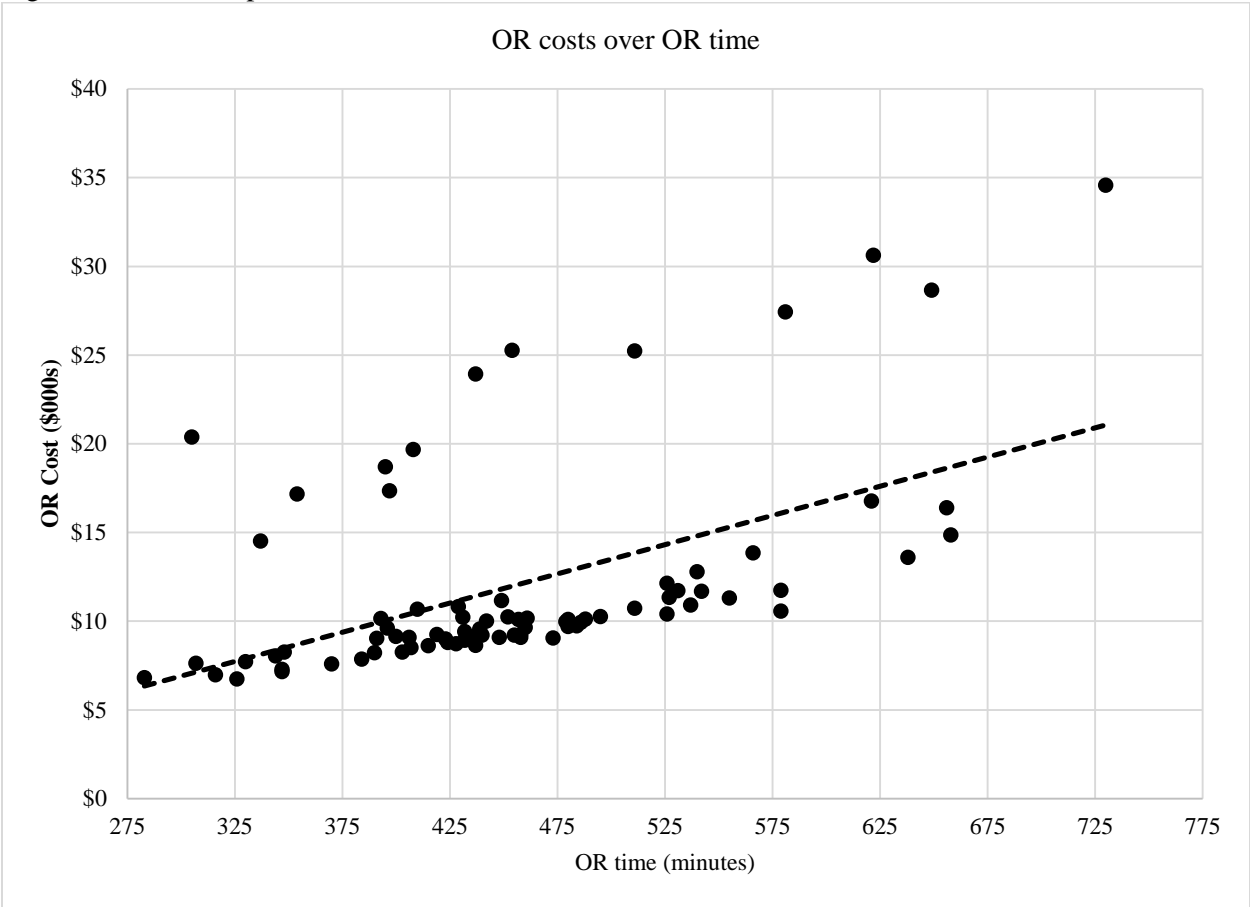

Abbreviations: OR = operating room.
